# Supplementary material for: Regulation of Inflammatory Response in Human Osteoarthritic Chondrocytes by Novel Herbal Small Molecules
Source: MDPI journal article supplement (doi:10.3390/ijms20225745), 2019-11-15

1. Isolation procedure for “Xian-Ling-Gu-Bao” extraction

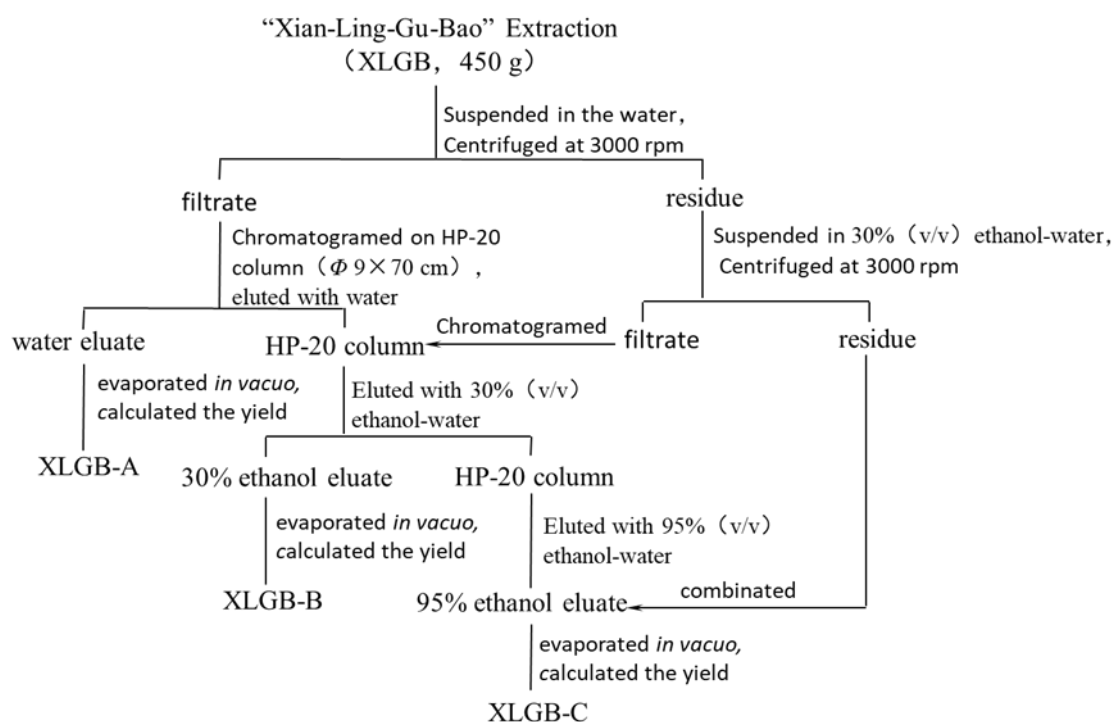

2. Isolation procedure for active fractions XLGB-B and XLGB-C

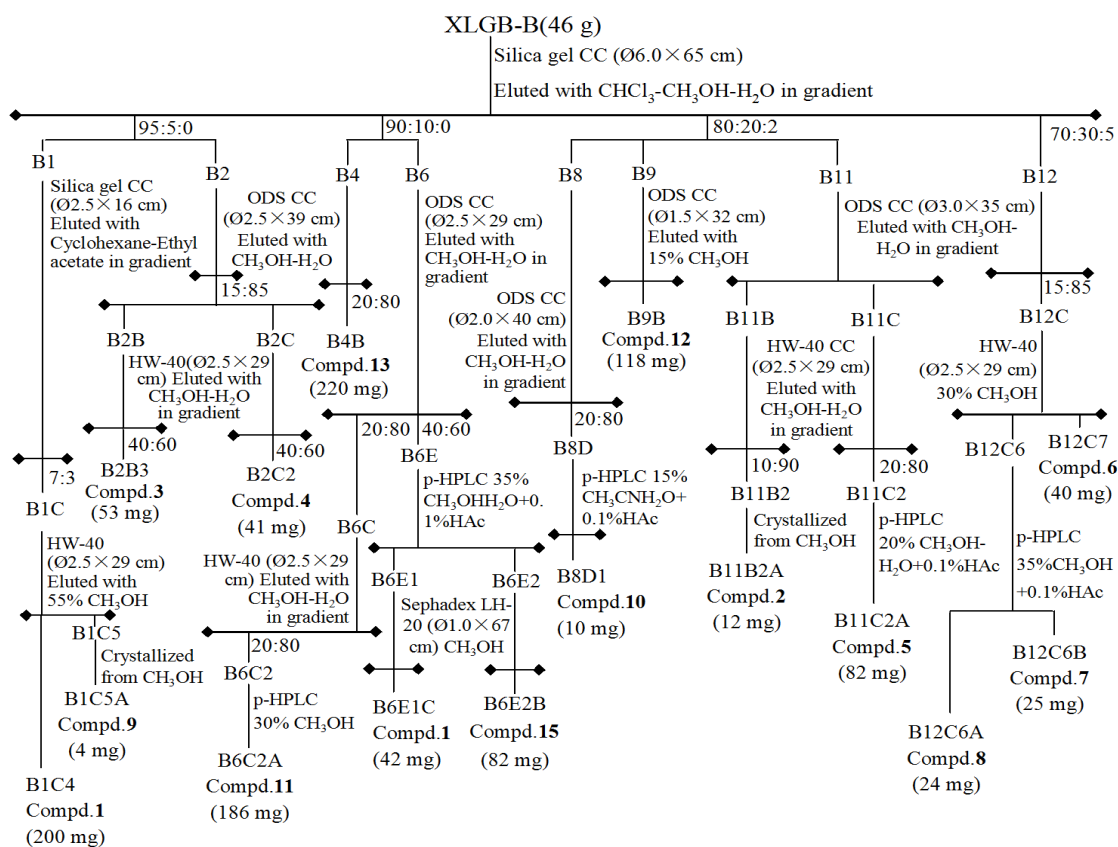

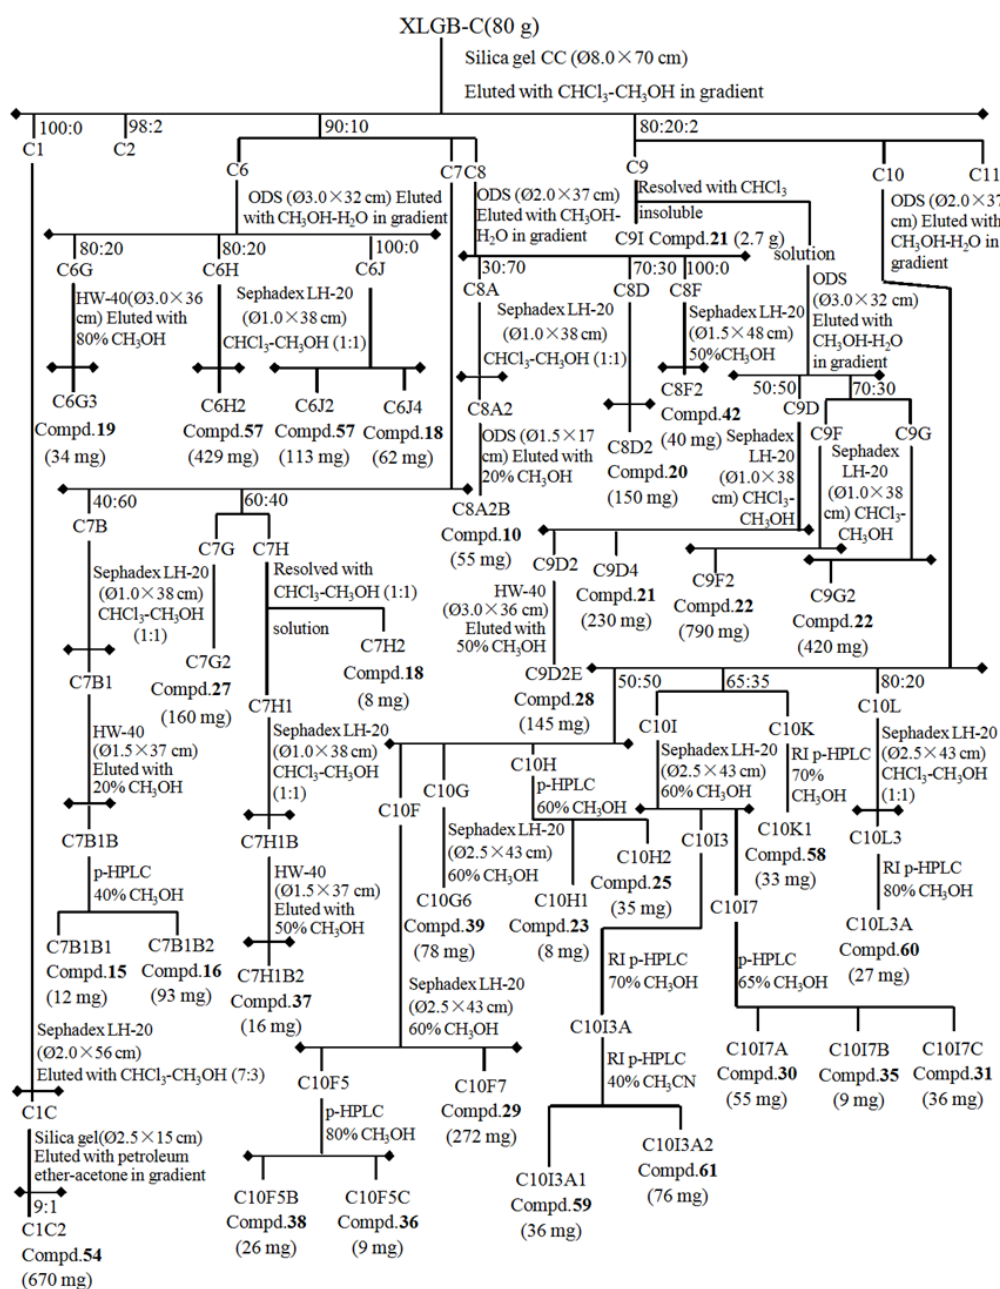

Supplement: s1 [file s1]
