# Supplementary material for: Regulation of Inflammatory Response in Human Osteoarthritic Chondrocytes by Novel Herbal Small Molecules
Source: MDPI journal article supplement (doi:10.3390/ijms20225745), 2019-11-15
Supplement: s1 [file s1]

| Compound                            | GAG/DNA ratio in three human OA chondrocytes donors |                 |                 |                 |                 |
|-------------------------------------|-----------------------------------------------------|-----------------|-----------------|-----------------|-----------------|
|                                     | Conc.[ $\mu$ M]                                     | 1               | 10              | 25              | 50              |
| <b>5-Hydroxymethylfurfural</b>      |                                                     | 2.07 $\pm$ 0.43 | 2.08 $\pm$ 0.26 | 2.79 $\pm$ 0.62 | 2.62 $\pm$ 0.36 |
| <b>Protocatechuicaldehyde</b>       |                                                     | 3.39 $\pm$ 1.23 | 2.97 $\pm$ 0.66 | 2.23 $\pm$ 0.47 | 2.05 $\pm$ 0.32 |
| <b>Vanillic acid</b>                |                                                     | 3.47 $\pm$ 0.12 | 2.58 $\pm$ 0.65 | 3.32 $\pm$ 1.22 | 2.14 $\pm$ 0.41 |
| <b>4-Hydroxybenzoic acid</b>        |                                                     | 2.01 $\pm$ 0.65 | 1.98 $\pm$ 0.33 | 2.89 $\pm$ 0.53 | 1.34 $\pm$ 0.63 |
| <b>Chlorogenic acid</b>             |                                                     | 1.53 $\pm$ 0.23 | 2.52 $\pm$ 0.97 | 2.07 $\pm$ 0.32 | 0.88 $\pm$ 0.39 |
| <b>Cryptochlorogenic acid</b>       |                                                     | 2.26 $\pm$ 0.55 | 1.29 $\pm$ 0.42 | 2.74 $\pm$ 0.87 | 0.91 $\pm$ 0.21 |
| <b>Loganic acid</b>                 |                                                     | 0.85 $\pm$ 0.13 | 0.91 $\pm$ 0.26 | 0.82 $\pm$ 0.58 | 0.93 $\pm$ 0.22 |
| <b>Loganin</b>                      |                                                     | 0.71 $\pm$ 0.14 | 1.69 $\pm$ 0.42 | 2.31 $\pm$ 0.37 | 0.16 $\pm$ 0.22 |
| <b>Isobavachalcone</b>              |                                                     | 1.70 $\pm$ 0.37 | 2.30 $\pm$ 0.75 | 1.59 $\pm$ 0.62 | 1.16 $\pm$ 0.56 |
| <b>Sweroside</b>                    |                                                     | 2.17 $\pm$ 0.33 | 1.83 $\pm$ 0.82 | 2.07 $\pm$ 0.94 | 1.35 $\pm$ 0.22 |
| <b>(+)-Cycloolivil</b>              |                                                     | 2.49 $\pm$ 0.52 | 1.18 $\pm$ 0.58 | 1.82 $\pm$ 0.32 | 0.19 $\pm$ 0.07 |
| <b>Baohuoside I</b>                 |                                                     | 2.54 $\pm$ 0.68 | 2.92 $\pm$ 0.42 | 1.65 $\pm$ 0.74 | 0.59 $\pm$ 0.04 |
| <b>2'-O-rhamnosylcariside II</b>    |                                                     | 3.40 $\pm$ 0.65 | 2.48 $\pm$ 0.53 | 3.65 $\pm$ 0.42 | 2.46 $\pm$ 0.23 |
| <b>Epimedin A</b>                   |                                                     | 2.92 $\pm$ 0.64 | 2.54 $\pm$ 0.23 | 3.64 $\pm$ 0.35 | 2.18 $\pm$ 0.48 |
| <b>Epimedin B</b>                   |                                                     | 2.14 $\pm$ 0.46 | 2.04 $\pm$ 0.22 | 2.75 $\pm$ 0.74 | 1.62 $\pm$ 0.26 |
| <b>Epimedin C</b>                   |                                                     | 2.16 $\pm$ 0.54 | 2.27 $\pm$ 0.30 | 3.82 $\pm$ 0.43 | 3.53 $\pm$ 0.32 |
| <b>Isobavachin</b>                  |                                                     | 1.74 $\pm$ 0.64 | 2.00 $\pm$ 0.28 | 1.50 $\pm$ 0.31 | 1.18 $\pm$ 0.46 |
| <b>Bavachin</b>                     |                                                     | 2.21 $\pm$ 0.34 | 2.05 $\pm$ 0.63 | 2.38 $\pm$ 0.83 | 0.84 $\pm$ 0.13 |
| <b>Bavachinin</b>                   |                                                     | 0.12 $\pm$ 0.07 | 0.32 $\pm$ 0.13 | 0.24 $\pm$ 0.02 | 0.17 $\pm$ 0.03 |
| <b>Neobavaisoflavone</b>            |                                                     | 1.08 $\pm$ 0.12 | 0.85 $\pm$ 0.14 | 0.91 $\pm$ 0.29 | 0.14 $\pm$ 0.05 |
| <b>Corylin</b>                      |                                                     | 0.59 $\pm$ 0.15 | 0.88 $\pm$ 0.12 | 0.90 $\pm$ 0.43 | 0.53 $\pm$ 0.16 |
| <b>Epimedin A1</b>                  |                                                     | 1.03 $\pm$ 0.32 | 0.88 $\pm$ 0.57 | 0.92 $\pm$ 0.14 | 0.08 $\pm$ 0.04 |
| <b>Psoralen</b>                     |                                                     | 1.47 $\pm$ 0.48 | 1.31 $\pm$ 0.34 | 1.70 $\pm$ 0.63 | 0.81 $\pm$ 0.38 |
| <b>Isopsoralen</b>                  |                                                     | 1.15 $\pm$ 0.47 | 0.90 $\pm$ 0.29 | 0.80 $\pm$ 0.14 | 0.84 $\pm$ 0.22 |
| <b>(S)-Bukuchiol</b>                |                                                     | 1.13 $\pm$ 0.35 | 1.15 $\pm$ 0.42 | 0.79 $\pm$ 0.26 | 0.88 $\pm$ 0.12 |
| <b>Psoralidin</b>                   |                                                     | 2.18 $\pm$ 0.57 | 1.67 $\pm$ 0.42 | 2.56 $\pm$ 0.78 | 1.74 $\pm$ 0.85 |
| <b>Asperosaponin VI</b>             |                                                     | 0.83 $\pm$ 0.18 | 0.80 $\pm$ 0.23 | 0.79 $\pm$ 0.19 | 0.79 $\pm$ 0.34 |
| <b>Baohuoside II</b>                |                                                     | 0.59 $\pm$ 0.03 | 0.79 $\pm$ 0.24 | 1.04 $\pm$ 0.28 | 0.77 $\pm$ 0.09 |
| <b>Epimedoside A</b>                |                                                     | 0.93 $\pm$ 0.07 | 0.82 $\pm$ 0.14 | 0.82 $\pm$ 0.04 | 0.67 $\pm$ 0.17 |
| <b>Baohuoside V</b>                 |                                                     | 0.96 $\pm$ 0.08 | 0.92 $\pm$ 0.05 | 0.88 $\pm$ 0.06 | 0.76 $\pm$ 0.03 |
| <b>Corylifol A</b>                  |                                                     | 1.14 $\pm$ 0.42 | 1.27 $\pm$ 0.31 | 1.03 $\pm$ 0.03 | 0.64 $\pm$ 0.07 |
| <b>4'-O-Methyl-brousssochalcone</b> |                                                     | 0.95 $\pm$ 0.22 | 0.78 $\pm$ 0.14 | 0.89 $\pm$ 0.19 | 0.89 $\pm$ 0.23 |
| <b>Anhydroicaritin</b>              |                                                     | 0.93 $\pm$ 0.02 | 0.80 $\pm$ 0.26 | 1.36 $\pm$ 0.28 | 0.93 $\pm$ 0.14 |
| <b>Icariin</b>                      |                                                     | 2.28 $\pm$ 0.17 | 2.25 $\pm$ 0.32 | 2.97 $\pm$ 0.53 | 2.81 $\pm$ 0.52 |

Supplementary Table 1. Anabolic effects of TCM compounds on glycosaminoglycan production
